# Supplementary material for: Deep clustering representation of spatially resolved transcriptomics data using multi-view variational graph auto-encoders with consensus clustering
Source: PubMed Central journal article supplement (PMC11664090; doi:10.1016/j.csbj.2024.11.041), 2024-12-02
Supplement: mmc1.pdf [file mmc1.pdf]

# Supplementary Materials

1

## 1. Supplementary Note

2

### 1.1. Comparison with other spatial domain identification methods parameter settings

3

4

We quantitatively compared STMVGAE with other methods on different datasets, including the non-spatial method SCANPY [1], and the spatial methods stLearn [2], SEDR [3], SpaGCN [4], DeepST [5], STAGATE [6] and STAMaker [7].

5

6

7

8

The selection of these comparison methods was based on the following considerations:

9

10

1. Relevance of methods. The chosen methods are advanced approaches specifically designed for spatial domain identification tasks in spatial transcriptomics. They address key research objectives, including spatial domain recognition, gene expression pattern analysis, and spatial data feature extraction, making them highly relevant to our study.

11

12

13

14

15

2. Influence in the Field. These methods have gained widespread recognition and citations in spatial transcriptomics research and have become benchmark models in the field.

16

17

18

3. Method Diversity. The selected methods encompass a variety of technical paradigms, enabling us to compare the performance of different types of approaches in spatial transcriptomics data analysis.

19

20

21

The parameter settings of these methods are as follows:

22

- SCANPY: First, we used the same data preprocessing method as STMVGAE to preprocess gene expression (log-transformed, normalized and selecting the top 3,000 HVGs). PCA dimensionality reduction was then used to reduce the gene expression data to 30 PCs. Finally, we used the `scanpy.pp.neighbors()` function default parameters provided by the SCANPY package [1] to calculate neighbors, and the `scanpy.tl.louvain()` function is used to allocate spots. Additionally, the resolution parameter was tuned manually to ensure the number of clustering is equal to the ground truth.
- stLearn: We chose default parameters for stLearn on the DLPFC dataset. Specifically, the `stLearn.SME.SME_normalized()` function was performed on the raw gene expression of all genes with the parameter `use_data="raw"`

23

24

25

26

27

28

29

30

31

32

33

34

35 and weights=“*physical\_distance*”. Then the first 30 PCs of the SME nor-  
36 malized matrix were used for clustering. We did not use stLearn for  
37 training on the melanoma dataset because it does not support training  
38 without histology images.

- 39 • SEDR: SEDR can be trained on all datasets, and we retain all its de-  
40 fault parameters except for empirically selecting the number of neigh-  
41 bors on different datasets to ensure reasonable results. We perform the  
42 same strategy on each dataset, looking for the number of neighbors that  
43 gives the best results between 6 and 12 neighbors. We set  $n$  in the  
44 *SEDR.graph\_construction()* function to 10 on the DLPFC dataset and  
45 to 12 on all other datasets.
- 46 • SpaGCN: We use its recommended parameters for SpaGCN in all datasets.
- 47 • DeepST: We retain all the default parameters of DeepST and set  $k$  in the  
48 *deepen.\_get\_graph()* function to 12. Additional, We tested the results  
49 on the melanoma dataset with DeepST set up without using histological  
50 images.
- 51 • STAGATE: STAGATE builds the graph by looking for neighbors within a  
52 radius, so the parameter  $r$  in the *STAGATE.Cal\_Spatial\_Net()* function  
53 changes in each dataset. We used the same rules as SEDR to select  $r$ . In  
54 DLPFC, we used the recommended parameter  $r$  set to 150,  $r$  in the BCDC  
55 data set to 350,  $r$  in the melanoma data set to 2, and  $r$  in the BRCA data  
56 set to 300.
- 57 • STAMaker: Recommended parameters are used in STAMaker, and neigh-  
58 bor selection is consistent with STAGATE. We set  $n$  to randomly initialize  
59 the model in STAMaker to 5.

## 60 1.2. Evaluation metrics of clustering

61 **ARI.** The adjusted Rand index (ARI) [8] is a measure of the similarity  
62 between two clusterings, and it is an external evaluation index. We introduce  
63 ARI to calculate the similarity between the results obtained by STMVGAE  
64 spot assignment and manual annotation. The calculation of ARI must first  
65 calculate the values of the contingency table. The contingency table contains  
66 the following four parts:  $TF$  is the count of spot pairs classified into the  
67 same cluster in both the true and predicted clustering.  $TN$  is the count  
68 of spot pairs classified into different clusters in both the true and predicted  
69 clustering.  $FN$  is the count of spot pairs classified into the same cluster

in the true clustering but into different clusters in the predicted clustering.  $FP$  is the count of spot pairs classified into different clusters in the true clustering but into the same cluster in the predicted clustering. The value range of ARI is between  $[-1,1]$ . Generally, the closer the ARI value is to 1, the better the result. The closer the ARI value is to 0, the clustering result is the same as the random clustering result. The calculation method of ARI is based on paired samples. It considers the combination of samples of the same category in different clusters in two clustering results and compares it with random situations. ARI is computed as:

$$ARI = \frac{TP + TN - E}{TP + TN + FP + FN - E} \quad (1)$$

The expected value of the index, denoted as  $E$ , represents the value that would be obtained if the clustering were entirely random. It is calculated as follows:

$$E = \frac{(TP + FP) \times (TP + FN) + (FN + TN) \times (FP + TN)}{TP + TN + FP + FN} \quad (2)$$

**NMI.** Normalized Mutual Information (NMI) is an indicator used to evaluate the performance of clustering algorithms. It measures the similarity between two clustering results. The NMI value ranges between  $[0,1]$ . The closer the value is to 1, the more similar the two clustering results are, while the closer the value is to 0, the less similar they are.  $P$  represents the spatial domain clustering result and  $T$  represents the ground truth clustering labels. Their entropies are denoted as  $H(P)$  and  $H(T)$  respectively. NMI has been widely used to evaluate the performance of spatial domain identification in spatial transcriptomic data analysis [9]. The calculation formula for NMI is as follows:

$$NMI = \frac{MI(P, T)}{\sqrt{H(P)H(T)}} \quad (3)$$

**HS.** In unsupervised clustering, Homogeneity Score (HS) is a metric used to evaluate clustering results, which measures whether the samples in each cluster belong to the same category [6]. The value of HS ranges from 0 to 1. The closer the value is to 1, the better the clustering result is, that is, each cluster contains samples of the same category.  $H(C)$  is the entropy of the true class, which represents the uncertainty of the class distribution of

98 the samples in the data set;  $H(C|K)$  is the conditional category entropy of a  
 99 given clustering result, which represents the uncertainty of the category dis-  
 100 tribution of the sample when the clustering result is known. The calculation  
 101 formula for HS is as follows:

$$HS = 1 - \frac{H(C|K)}{H(C)} \quad (4)$$

102 **Purity.** In unsupervised clustering, Purity is a metric used to evaluate  
 103 clustering results, which measures whether the samples contained in each  
 104 cluster belong to the same category. The value range of Purity is between 0  
 105 and 1. The closer the value is to 1, the better the clustering result is, that is,  
 106 each cluster contains samples of the same category.  $N$  is the total number  
 107 of samples in the dataset,  $k$  represents the index of the cluster,  $j$  represents  
 108 the index of the real category,  $c_k$  represents the sample set in cluster  $k$ , and  
 109  $t_j$  represents the sample set in real category  $j$ . The  $|c_k \cap t_j|$  in the formula  
 110 represents the size of the intersection of samples in cluster  $k$  and samples in  
 111 true category  $j$ . The calculation formula for Purity is as follows:

$$Purity = \frac{1}{N} \sum_k \max_j |c_k \cap t_j| \quad (5)$$

### 112 1.3. Implementation Details

113 Our experiments were performed on a single NVIDIA RTX 4090Ti GPU  
 114 using PyTorch (version 1.13.1) and Python 3.11. In the “ST data augmenta-  
 115 tion” section, we selected Resnet50 as the default convolutional neural net-  
 116 work, and then introduced two parameters  $\alpha_1$  and  $\alpha_2$  to balance the image  
 117 feature matrix and the gene expression matrix. We fixed  $\alpha_2$  to 1.0, and set  
 118  $\alpha_1$  to 0.2 through experiments. In the “Spatial graph construction” section,  
 119 we selected neighbors with a strategy that the number of neighbors will not  
 120 be zero and will not generate too many neighbors (more than 12), and the  
 121 best performance is obtained within this range. The baseline method also  
 122 used the same strategy. On different datasets, the construction parameters  
 123 of the adjacency matrix are set as follows:

- 124 • DLPFC dataset: adjacency matrix parameters based on Radius  $r = 250$   
 125 , adjacency matrix parameters based on KNN  $k = 12$  .
- 126 • BCDC dataset: adjacency matrix parameters based on Radius  $r = 300$  ,  
 127 adjacency matrix parameters based on KNN  $k = 5$  .

- Melanoma dataset: adjacency matrix parameters based on Radius  $r = 3$  128  
, adjacency matrix parameters based on KNN  $k = 7$  . 129
- BRCA dataset: adjacency matrix parameters based on Radius  $r = 500$  , 130  
adjacency matrix parameters based on KNN  $k = 11$  . 131

The linear encoder was set to [1000, 400, 30]. Then, the hidden representation 132  
is learned through a two-layer GCN encoder. The GCN was set to [64, 8] and 133  
the linear decoder is set to [400, 1000]. The training strategy was established 134  
for 1000 epochs, the learning rate set at 0.001 and the weight decay set at 135  
0.0001. For the loss function, we chose the hyperparameters empirically, we 136  
set  $\lambda_1$  and  $\lambda_4$  to 0.1,  $\lambda_2$  and  $\lambda_3$  to 1.0. 137

138 2. Supplementary Figure

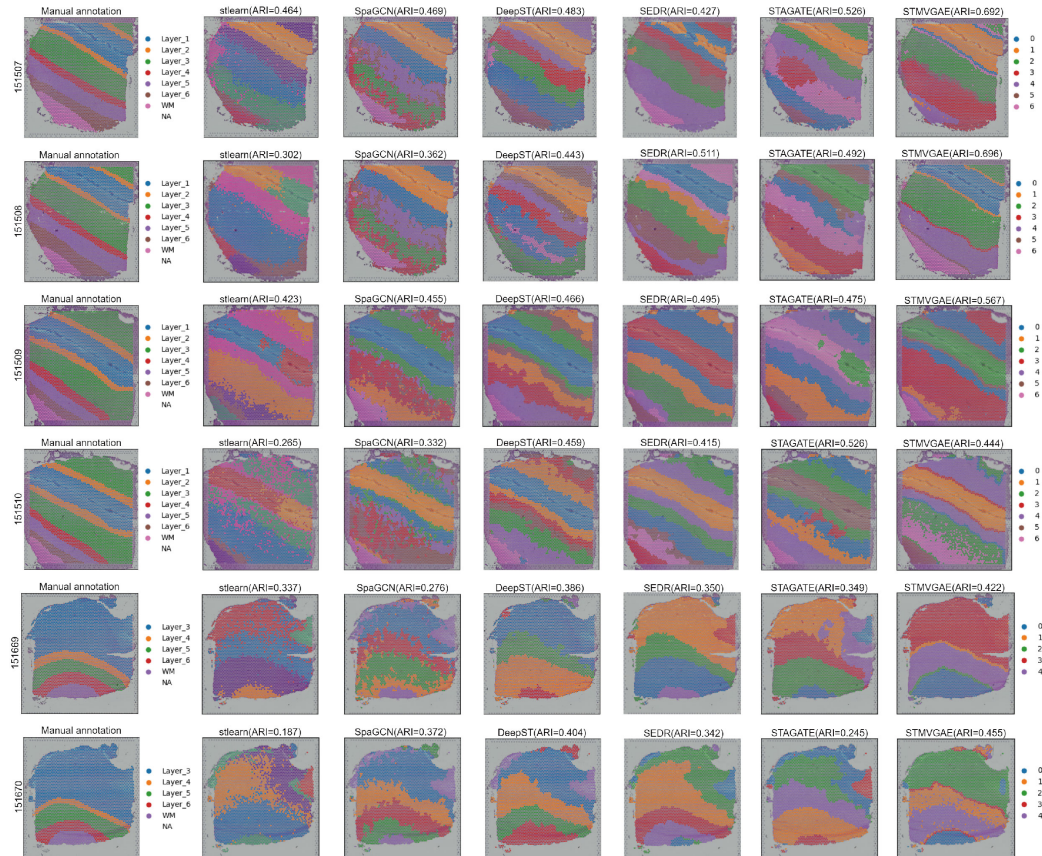

See next page

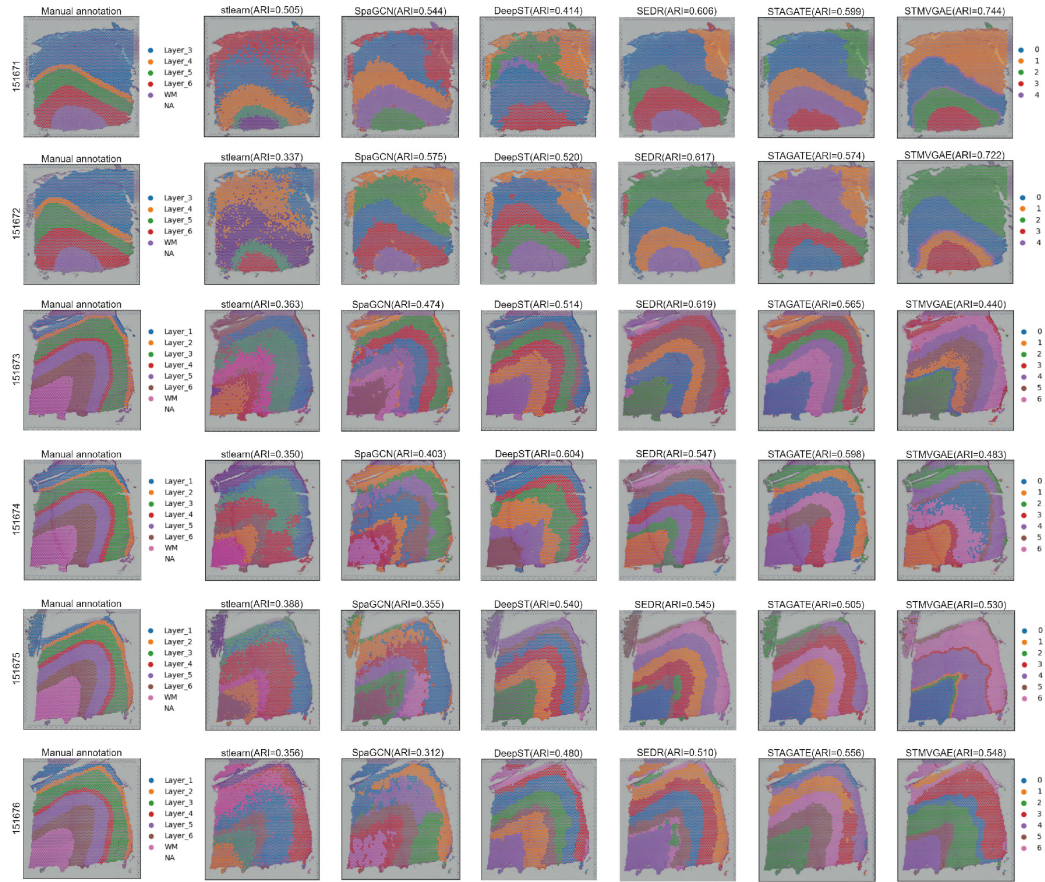

Figure S1. Comparison of spatial domains identification by clustering assignments via STMVGAE, STAGATE, SEDR, DeepST, stLearn, and manual annotation in all 12 slices of the DLPFC dataset.

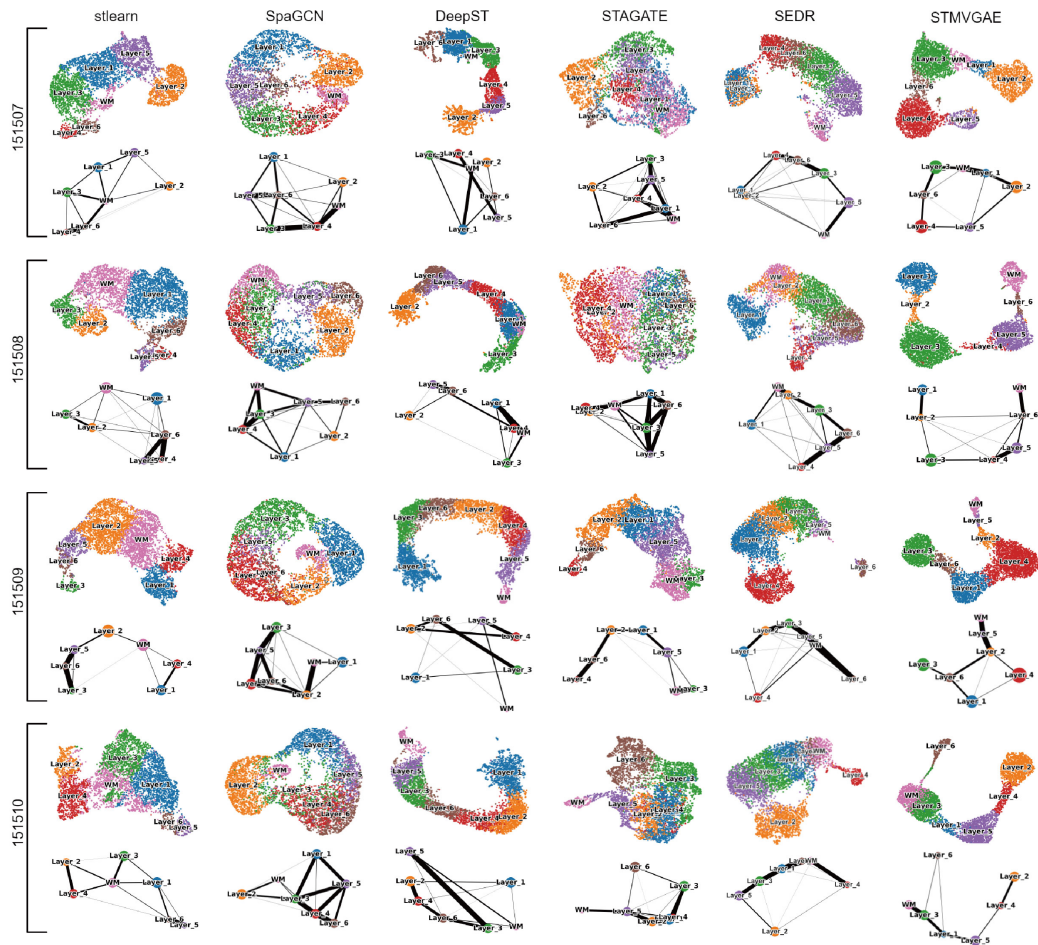

See next page



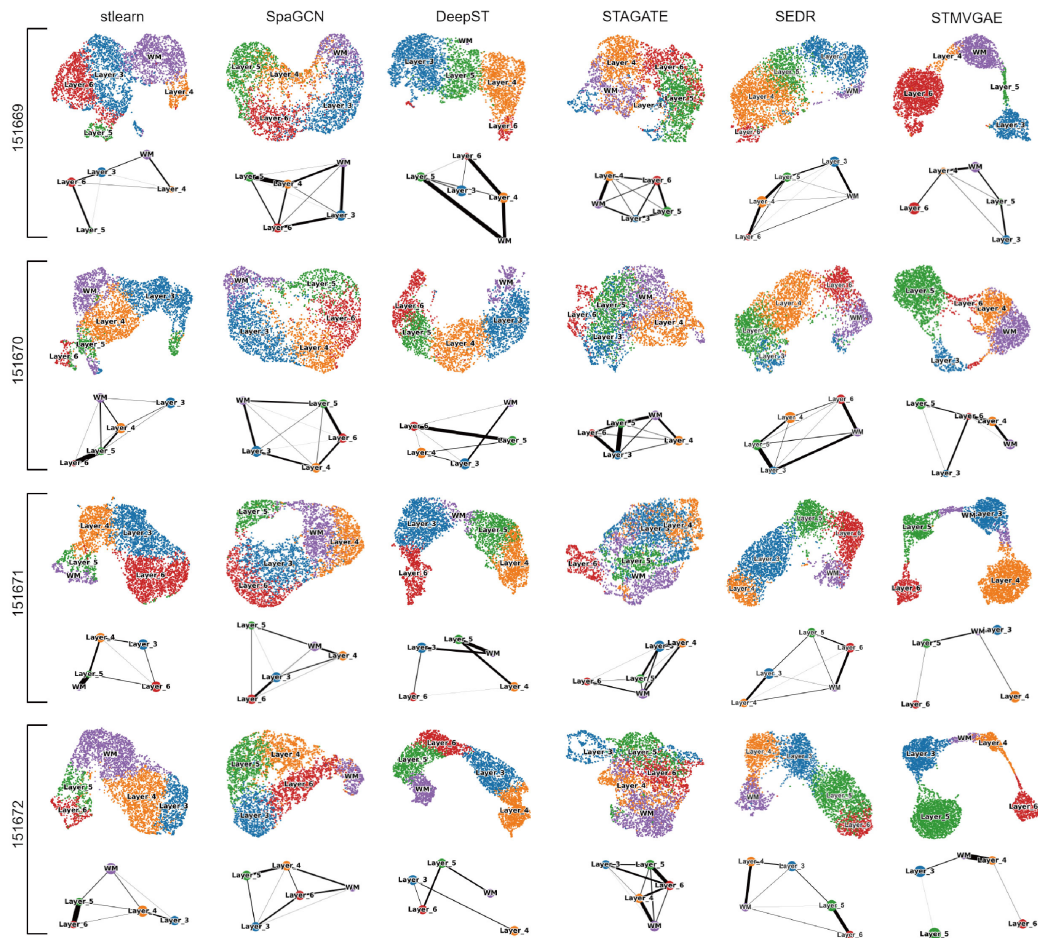

See next page

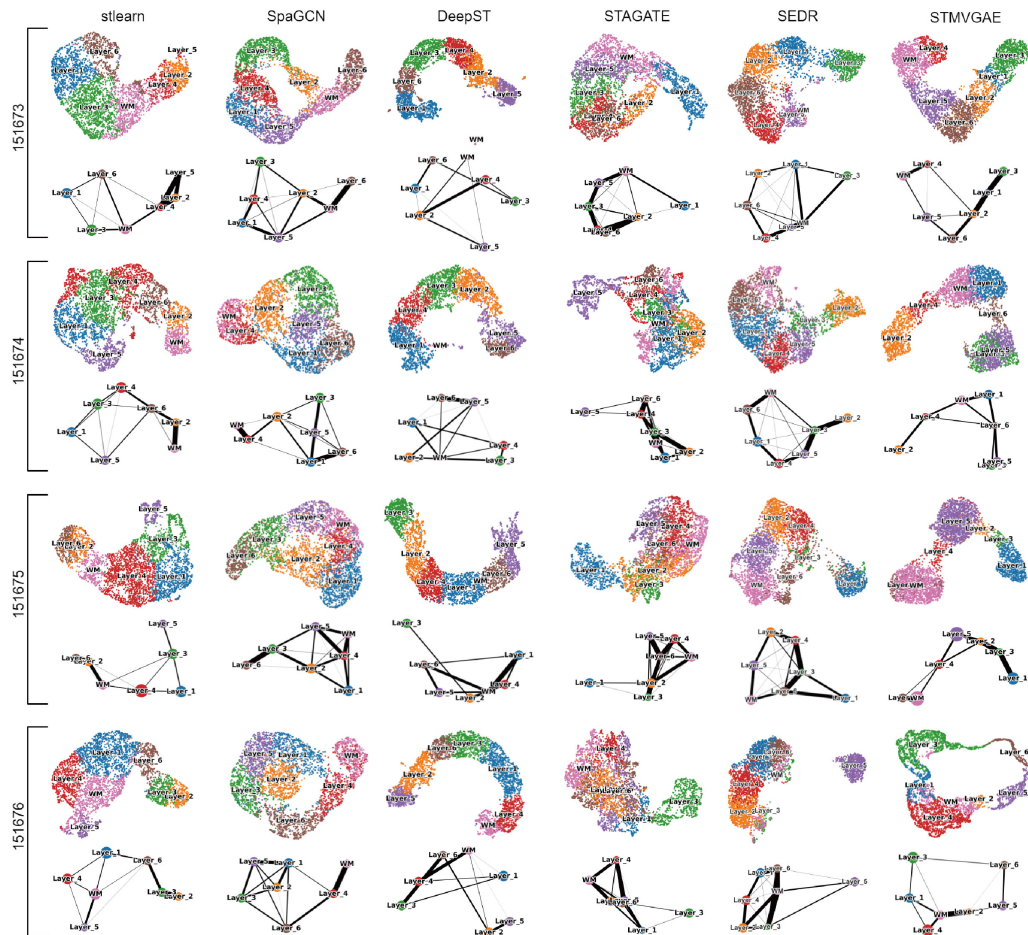

Figure S2. UMAP visualization and PAGA trajectory inference by STMVGAE, SEDR, STAGATE, DeepST, SpaGCN, and stLearn embeddings respectively.

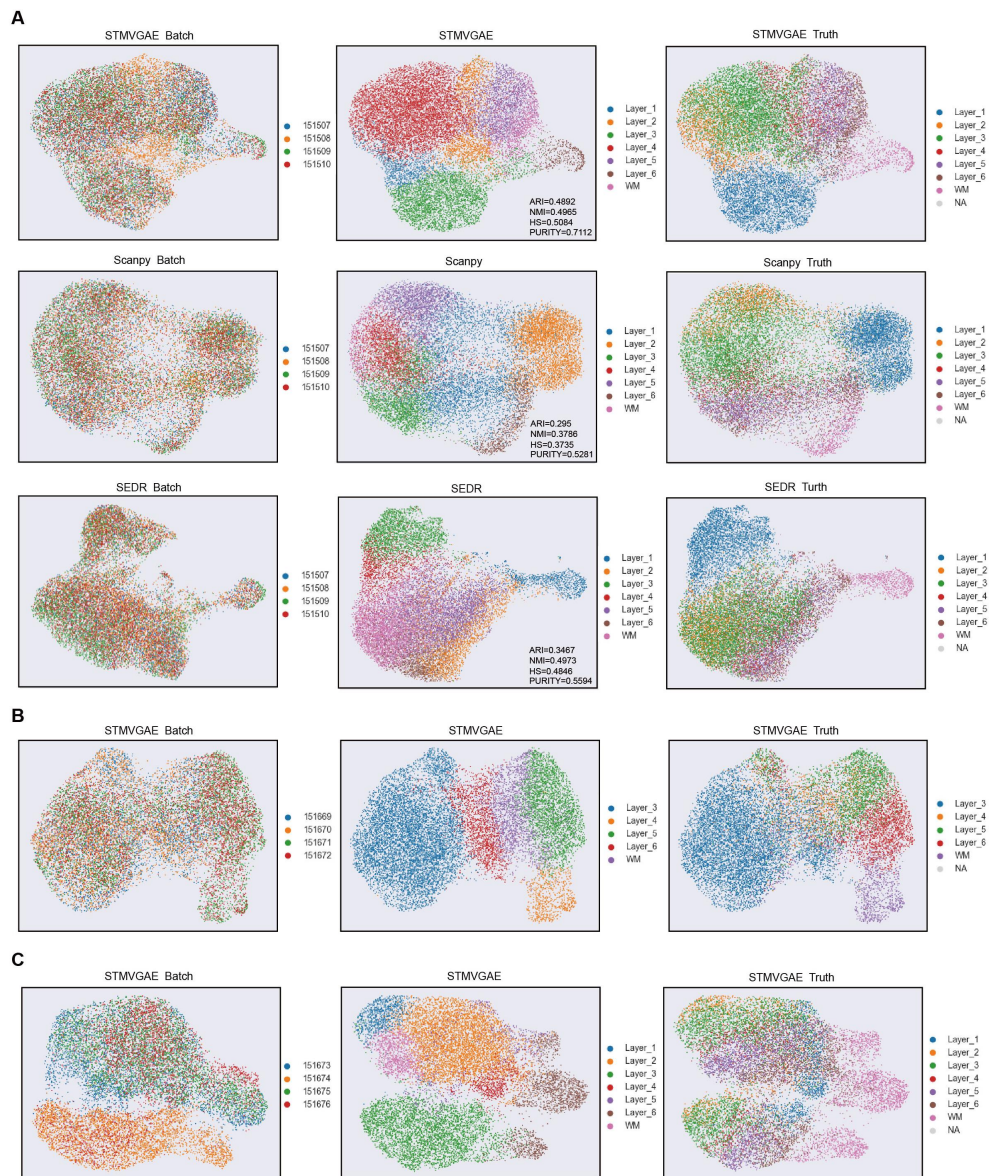

Figure S3. **(A)** UMAP visualization of multi-slice joint analysis on 151507-151510 slices in DLPFC datasets. Each row represents the use of STMVGAE, SCANPY, and SEDR methods with Harmony for batch integration, and each column represents batches, identification spatial domains, and ground truth labels, respectively. **(B)** STMVGAE performs multi-slice joint analysis on 151669-151672 slices in the DLPFC dataset. **(C)** STMVGAE performs multi-slice joint analysis on 151673-151676 slices in the DLPFC dataset.

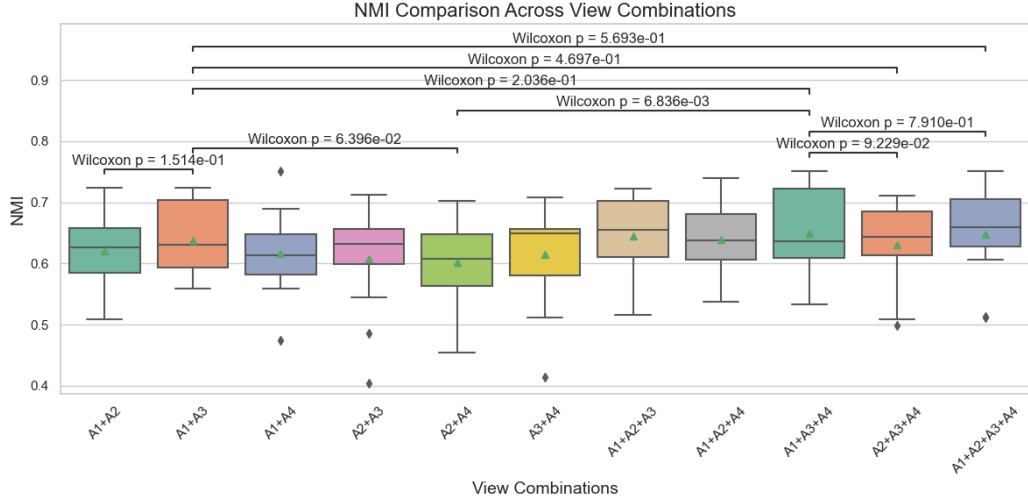

Figure S4. Box plot and significance markers of the NMI values of the STMVGAE method under multiple view combinations. The significance markers are calculated by the Wilcoxon rank sum test.

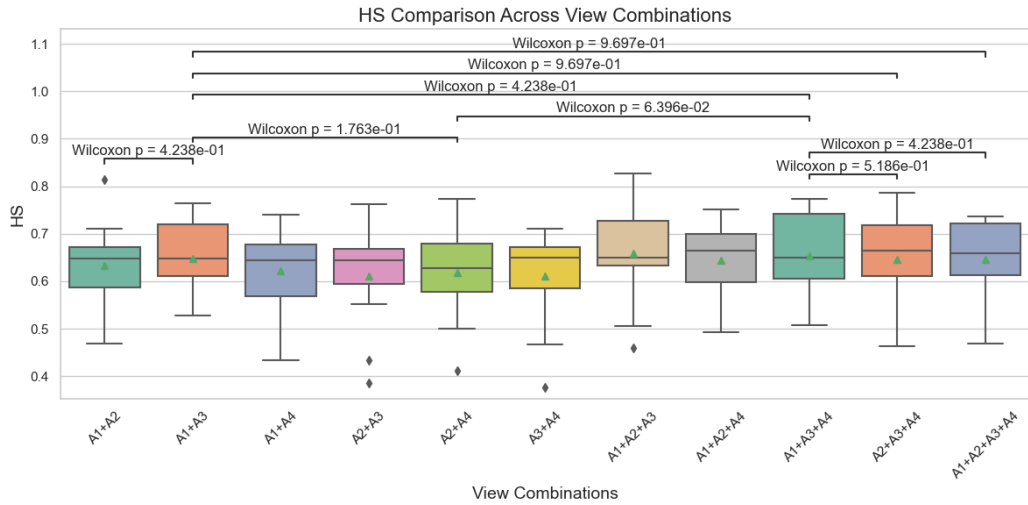

Figure S5. Box plot and significance markers of the HS values of the STMVGAE method under multiple view combinations. The significance markers are calculated by the Wilcoxon rank sum test.

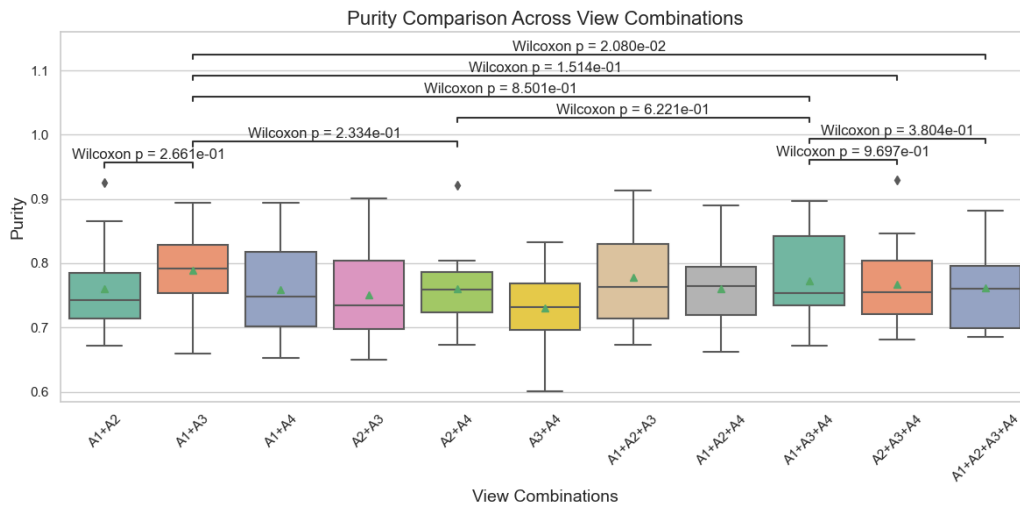

Figure S6. Box plot and significance markers of the Purity values of the STMVGAE method under multiple view combinations. The significance markers are calculated by the Wilcoxon rank sum test.

139 **3. Supplementary Table**

Table S1: Overview of comparative spatial domain identification methods.

| Method      | Methodology                    | Input Data                                                             | Downstream tasks                                                                                        | Link                                                                                                                    |
|-------------|--------------------------------|------------------------------------------------------------------------|---------------------------------------------------------------------------------------------------------|-------------------------------------------------------------------------------------------------------------------------|
| SCANPY [1]  | Non-spatial method             | Gene expression data                                                   | Spatial domain identification<br>Visualization<br>Trajectory inference                                  | <a href="https://scanpy.readthedocs.io/">https://scanpy.readthedocs.io/</a>                                             |
| stLearn [2] | Deep neural network            | Gene expression data<br>Histology information                          | Spatial domain identification<br>Visualization<br>Trajectory inference                                  | <a href="https://github.com/BiomedicalMachineLearning/stLearn">https://github.com/BiomedicalMachineLearning/stLearn</a> |
| SEDR [3]    | Variational graph autoencoders | Spatial location data<br>Gene expression data                          | Spatial domain identification<br>Visualization<br>Trajectory inference<br>Denosing<br>Batch integration | <a href="https://github.com/HzFu/SEDR/">https://github.com/HzFu/SEDR/</a>                                               |
| SpaGCN [4]  | Graph convolutional networks   | Spatial location data<br>Gene expression data<br>Histology information | Spatial domain identification<br>Visualization<br>Trajectory inference<br>SVGs identification           | <a href="https://github.com/jianhuupenn/SpaGCN/">https://github.com/jianhuupenn/SpaGCN/</a>                             |
| DeepST [5]  | Variational graph autoencoders | Spatial location data<br>Gene expression data<br>Histology information | Spatial domain identification<br>Visualization<br>Trajectory inference<br>Batch integration             | <a href="https://github.com/JiangBioLab/DeepST/">https://github.com/JiangBioLab/DeepST/</a>                             |
| STAGATE [6] | Graph attention autoencoders   | Spatial location data<br>Gene expression data                          | Spatial domain identification<br>Visualization<br>Trajectory inference<br>Denosing                      | <a href="https://github.com/zhanglabtools/STAGATE/">https://github.com/zhanglabtools/STAGATE/</a>                       |

Table S2: Summary of the datasets in this study.

| Platform               | Tissue                                           | Section    | Number of domains                                 | Spots | Genes |
|------------------------|--------------------------------------------------|------------|---------------------------------------------------|-------|-------|
| 10X Visium             | Human dorsolateral prefrontal cortex (DLPFC)[10] | 151507     | 7                                                 | 4226  | 33538 |
|                        |                                                  | 151508     | 7                                                 | 4384  |       |
|                        |                                                  | 151509     | 7                                                 | 4789  |       |
|                        |                                                  | 151510     | 7                                                 | 4634  |       |
|                        |                                                  | 151669     | 5                                                 | 3661  |       |
|                        |                                                  | 151670     | 5                                                 | 3498  |       |
|                        |                                                  | 151671     | 5                                                 | 4110  |       |
|                        |                                                  | 151672     | 5                                                 | 4015  |       |
|                        |                                                  | 151673     | 7                                                 | 3639  |       |
|                        |                                                  | 151674     | 7                                                 | 3673  |       |
|                        |                                                  | 151675     | 7                                                 | 3592  |       |
|                        |                                                  | 151676     | 7                                                 | 3460  |       |
|                        |                                                  | 10X Visium | Human breast cancer: ductal carcinoma in situ[11] | \     |       |
| Human breast[3] cancer | \                                                |            | 20                                                | 3798  | 36601 |
| Spatialresearch        | Melanoma cancer[12]                              | \          | 4                                                 | 293   | 16148 |
| Stereo-seq             | Mouse olfactory bulb[13]                         | \          | \                                                 | 19109 | 27106 |

Table S3: Experiments on selection of hyperparameters  $\alpha_1$  and  $\alpha_2$ . Because gene expression is important for spatial transcriptomics analysis, we want to preserve its raw gene expression matrix, so we fixed  $\alpha_2$  to 1.0. We explored the impact of the “ST data augmentation” module on performance by changing  $\alpha_1$ .

| $\alpha_1$ | DLPFC        |              |              |              | BCDC         |              |              |              | BRCA         |              |              |              |
|------------|--------------|--------------|--------------|--------------|--------------|--------------|--------------|--------------|--------------|--------------|--------------|--------------|
|            | ARI          | NMI          | HS           | Purity       | ARI          | NMI          | HS           | Purity       | ARI          | NMI          | HS           | Purity       |
| 1.0        | 0.261        | 0.384        | 0.377        | 0.540        | 0.523        | 0.415        | 0.393        | 0.865        | 0.535        | 0.635        | 0.626        | 0.583        |
| 0.5        | 0.437        | 0.592        | 0.614        | 0.752        | 0.677        | 0.572        | 0.547        | 0.914        | 0.569        | 0.682        | 0.671        | 0.634        |
| 0.2        | <b>0.562</b> | <b>0.638</b> | <b>0.648</b> | <b>0.789</b> | <b>0.730</b> | <b>0.584</b> | <b>0.583</b> | <b>0.931</b> | <b>0.660</b> | <b>0.699</b> | <b>0.689</b> | <b>0.678</b> |



Table S4: STMVGAE performs graph combination test results on 12 slices of the DLPFC dataset. STMVGAE integrates the results of four different graphs in a free combination manner to calculate ARI, NMI, HS, and Pur (Purity) respectively.  $A^{(1)}$ ,  $A^{(2)}$ ,  $A^{(3)}$ , and  $A^{(4)}$  represent Radius\_balltree, Radius\_kdtree, KNN\_balltree, and KNN\_kdtree respectively. The best result is underlined.

| Slice   | $A^{(1)} + A^{(2)}$ |       |       |       | $A^{(1)} + A^{(3)}$ |              |              |              | $A^{(1)} + A^{(4)}$ |       |       |       | $A^{(2)} + A^{(3)}$ |       |       |       | $A^{(2)} + A^{(4)}$ |       |       |       | $A^{(3)} + A^{(4)}$ |       |       |       |     |     |    |
|---------|---------------------|-------|-------|-------|---------------------|--------------|--------------|--------------|---------------------|-------|-------|-------|---------------------|-------|-------|-------|---------------------|-------|-------|-------|---------------------|-------|-------|-------|-----|-----|----|
|         | ARI                 | NMI   | HS    | Pur   | ARI                 | NMI          | HS           | Pur          | ARI                 | NMI   | HS    | Pur   | ARI                 | NMI   | HS    | Pur   | ARI                 | NMI   | HS    | Pur   | ARI                 | NMI   | HS    | Pur   | ARI | NMI | HS |
| 151507  | 0.549               | 0.662 | 0.664 | 0.685 | 0.692               | 0.712        | 0.763        | 0.860        | 0.548               | 0.644 | 0.658 | 0.737 | 0.561               | 0.677 | 0.675 | 0.698 | 0.501               | 0.648 | 0.673 | 0.754 | 0.567               | 0.698 | 0.710 | 0.750 |     |     |    |
| 151508  | 0.594               | 0.657 | 0.681 | 0.813 | 0.696               | 0.703        | 0.724        | 0.821        | 0.666               | 0.689 | 0.739 | 0.841 | 0.582               | 0.620 | 0.640 | 0.801 | 0.503               | 0.604 | 0.606 | 0.691 | 0.573               | 0.664 | 0.654 | 0.686 |     |     |    |
| 151509  | 0.421               | 0.585 | 0.573 | 0.672 | 0.567               | 0.644        | 0.636        | 0.783        | 0.421               | 0.588 | 0.581 | 0.704 | 0.504               | 0.637 | 0.609 | 0.699 | 0.411               | 0.567 | 0.560 | 0.673 | 0.604               | 0.653 | 0.643 | 0.773 |     |     |    |
| 151510  | 0.557               | 0.651 | 0.610 | 0.737 | 0.444               | 0.562        | 0.532        | 0.660        | 0.403               | 0.559 | 0.530 | 0.653 | 0.548               | 0.651 | 0.607 | 0.719 | 0.496               | 0.648 | 0.613 | 0.734 | 0.410               | 0.560 | 0.544 | 0.648 |     |     |    |
| 151669  | 0.400               | 0.523 | 0.513 | 0.775 | 0.422               | 0.570        | 0.530        | 0.739        | 0.415               | 0.562 | 0.527 | 0.776 | 0.201               | 0.405 | 0.386 | 0.670 | 0.375               | 0.492 | 0.499 | 0.769 | 0.342               | 0.512 | 0.467 | 0.701 |     |     |    |
| 151670  | 0.386               | 0.509 | 0.468 | 0.722 | 0.455               | 0.559        | 0.527        | 0.758        | 0.337               | 0.475 | 0.433 | 0.693 | 0.324               | 0.486 | 0.433 | 0.650 | 0.314               | 0.455 | 0.412 | 0.688 | 0.246               | 0.414 | 0.376 | 0.601 |     |     |    |
| 151671  | 0.770               | 0.724 | 0.711 | 0.866 | 0.744               | 0.707        | 0.720        | 0.895        | 0.784               | 0.751 | 0.741 | 0.894 | 0.706               | 0.688 | 0.665 | 0.833 | 0.746               | 0.703 | 0.773 | 0.921 | 0.698               | 0.708 | 0.688 | 0.833 |     |     |    |
| 151672  | 0.670               | 0.697 | 0.814 | 0.925 | 0.722               | 0.724        | 0.740        | 0.851        | 0.640               | 0.658 | 0.690 | 0.811 | 0.700               | 0.713 | 0.762 | 0.902 | 0.686               | 0.701 | 0.710 | 0.805 | 0.617               | 0.654 | 0.692 | 0.831 |     |     |    |
| 151673  | 0.446               | 0.624 | 0.670 | 0.731 | 0.440               | 0.618        | 0.639        | 0.708        | 0.464               | 0.638 | 0.659 | 0.739 | 0.430               | 0.618 | 0.647 | 0.744 | 0.496               | 0.645 | 0.699 | 0.804 | 0.499               | 0.647 | 0.656 | 0.749 |     |     |    |
| 151674  | 0.454               | 0.584 | 0.591 | 0.689 | 0.483               | 0.608        | 0.655        | 0.801        | 0.427               | 0.607 | 0.610 | 0.667 | 0.458               | 0.544 | 0.552 | 0.725 | 0.420               | 0.554 | 0.584 | 0.743 | 0.466               | 0.588 | 0.599 | 0.711 |     |     |    |
| 151675  | 0.504               | 0.628 | 0.656 | 0.764 | 0.530               | 0.601        | 0.641        | 0.817        | 0.538               | 0.621 | 0.674 | 0.839 | 0.479               | 0.629 | 0.697 | 0.815 | 0.486               | 0.601 | 0.641 | 0.764 | 0.528               | 0.652 | 0.665 | 0.767 |     |     |    |
| 151676  | 0.444               | 0.601 | 0.641 | 0.750 | 0.548               | 0.643        | 0.667        | 0.773        | 0.513               | 0.602 | 0.632 | 0.758 | 0.469               | 0.634 | 0.664 | 0.762 | 0.488               | 0.611 | 0.652 | 0.780 | 0.477               | 0.632 | 0.642 | 0.715 |     |     |    |
| Average | 0.516               | 0.620 | 0.633 | 0.761 | <u>0.562</u>        | <u>0.638</u> | <u>0.648</u> | <u>0.789</u> | 0.513               | 0.616 | 0.623 | 0.759 | 0.497               | 0.608 | 0.611 | 0.751 | 0.494               | 0.602 | 0.618 | 0.761 | 0.502               | 0.615 | 0.611 | 0.730 |     |     |    |

Table S5: STMVGAE performs graph combination test results on 12 slices of the DLPFC dataset. STMVGAE integrates the results of four different graphs in a free combination manner to calculate ARI, NMI, HS, and Pur (Purity) respectively.  $A^{(1)}$ ,  $A^{(2)}$ ,  $A^{(3)}$ , and  $A^{(4)}$  represent Radius\_balltree, Radius\_kdtree, KNN\_balltree, and KNN\_kdtree respectively. The best result is underlined.

| Slice   | $A^{(1)} + A^{(2)} + A^{(3)}$ |       |       |       | $A^{(1)} + A^{(2)} + A^{(4)}$ |       |       |       | $A^{(1)} + A^{(3)} + A^{(4)}$ |              |              |              | $A^{(2)} + A^{(3)} + A^{(4)}$ |       |       |       | $A^{(1)} + A^{(2)} + A^{(3)} + A^{(4)}$ |       |       |       |
|---------|-------------------------------|-------|-------|-------|-------------------------------|-------|-------|-------|-------------------------------|--------------|--------------|--------------|-------------------------------|-------|-------|-------|-----------------------------------------|-------|-------|-------|
|         | ARI                           | NMI   | HS    | Pur   | ARI                           | NMI   | HS    | Pur   | ARI                           | NMI          | HS           | Pur          | ARI                           | NMI   | HS    | Pur   | ARI                                     | NMI   | HS    | Pur   |
| 151507  | 0.618                         | 0.708 | 0.827 | 0.913 | 0.581                         | 0.699 | 0.710 | 0.761 | 0.688                         | 0.729        | 0.773        | 0.866        | 0.569                         | 0.700 | 0.715 | 0.771 | 0.583                                   | 0.704 | 0.719 | 0.776 |
| 151508  | 0.660                         | 0.700 | 0.721 | 0.824 | 0.625                         | 0.674 | 0.696 | 0.814 | 0.705                         | 0.723        | 0.753        | 0.839        | 0.597                         | 0.681 | 0.724 | 0.847 | 0.676                                   | 0.708 | 0.730 | 0.821 |
| 151509  | 0.570                         | 0.657 | 0.641 | 0.776 | 0.428                         | 0.612 | 0.601 | 0.693 | 0.570                         | 0.646        | 0.630        | 0.747        | 0.496                         | 0.643 | 0.618 | 0.696 | 0.574                                   | 0.656 | 0.644 | 0.777 |
| 151510  | 0.501                         | 0.652 | 0.635 | 0.717 | 0.438                         | 0.634 | 0.603 | 0.680 | 0.411                         | 0.588        | 0.563        | 0.678        | 0.421                         | 0.622 | 0.593 | 0.681 | 0.433                                   | 0.635 | 0.614 | 0.686 |
| 151669  | 0.353                         | 0.543 | 0.506 | 0.746 | 0.417                         | 0.551 | 0.515 | 0.773 | 0.374                         | 0.558        | 0.534        | 0.739        | 0.384                         | 0.498 | 0.495 | 0.767 | 0.298                                   | 0.513 | 0.481 | 0.727 |
| 151670  | 0.335                         | 0.516 | 0.459 | 0.673 | 0.423                         | 0.537 | 0.493 | 0.741 | 0.481                         | 0.534        | 0.507        | 0.764        | 0.379                         | 0.509 | 0.462 | 0.685 | 0.443                                   | 0.512 | 0.470 | 0.743 |
| 151671  | 0.745                         | 0.723 | 0.748 | 0.910 | 0.826                         | 0.740 | 0.751 | 0.890 | 0.790                         | 0.751        | 0.742        | 0.896        | 0.729                         | 0.701 | 0.785 | 0.929 | 0.798                                   | 0.751 | 0.736 | 0.882 |
| 151672  | 0.726                         | 0.718 | 0.755 | 0.848 | 0.704                         | 0.705 | 0.748 | 0.827 | 0.725                         | 0.723        | 0.742        | 0.855        | 0.709                         | 0.712 | 0.728 | 0.815 | 0.718                                   | 0.717 | 0.736 | 0.850 |
| 151673  | 0.500                         | 0.654 | 0.659 | 0.694 | 0.543                         | 0.675 | 0.694 | 0.788 | 0.532                         | 0.672        | 0.687        | 0.741        | 0.498                         | 0.645 | 0.648 | 0.738 | 0.512                                   | 0.665 | 0.665 | 0.702 |
| 151676  | 0.490                         | 0.592 | 0.625 | 0.749 | 0.422                         | 0.587 | 0.590 | 0.662 | 0.477                         | 0.628        | 0.620        | 0.672        | 0.460                         | 0.592 | 0.625 | 0.742 | 0.463                                   | 0.607 | 0.613 | 0.693 |
| 151675  | 0.528                         | 0.662 | 0.691 | 0.779 | 0.507                         | 0.624 | 0.652 | 0.768 | 0.462                         | 0.616        | 0.655        | 0.760        | 0.473                         | 0.621 | 0.680 | 0.801 | 0.531                                   | 0.661 | 0.693 | 0.788 |
| 151676  | 0.442                         | 0.616 | 0.635 | 0.708 | 0.471                         | 0.643 | 0.679 | 0.728 | 0.445                         | 0.616        | 0.644        | 0.721        | 0.479                         | 0.647 | 0.687 | 0.730 | 0.476                                   | 0.642 | 0.654 | 0.691 |
| Average | 0.539                         | 0.645 | 0.658 | 0.778 | 0.532                         | 0.640 | 0.644 | 0.760 | <u>0.555</u>                  | <u>0.649</u> | <u>0.654</u> | <u>0.773</u> | 0.516                         | 0.631 | 0.647 | 0.767 | 0.542                                   | 0.648 | 0.646 | 0.761 |

140 **References**

- 141 [1] F Alexander Wolf, Philipp Angerer, et al. SCANPY: large-scale single-  
142 cell gene expression data analysis. *Genome Biology*, 19:1–5, 2018.
- 143 [2] Duy Pham, Xiao Tan, et al. stlearn: Robust mapping of spatiotemporal  
144 trajectories and cell–cell interactions in healthy and diseased tissues.  
145 *Nature Communications*, 14(1):7739, 2023.
- 146 [3] Hang Xu, Huazhu Fu, et al. SEDR: Unsupervised spatially embed-  
147 ded deep representation of spatial transcriptomics. *Genome Medicine*,  
148 16(1):1–15, 2024.
- 149 [4] Jian Hu, Xiangjie Li, et al. SpaGCN: Integrating gene expression, spatial  
150 location and histology to identify spatial domains and spatially variable  
151 genes by graph convolutional network. *Nature Methods*, 18(11):1342–  
152 1351, 2021.
- 153 [5] Chang Xu, Xiyun Jin, et al. DeepST: identifying spatial domains  
154 in spatial transcriptomics by deep learning. *Nucleic Acids Research*,  
155 50(22):e131–e131, 2022.
- 156 [6] Kangning Dong and Shihua Zhang. STAGATE: Deciphering spatial  
157 domains from spatially resolved transcriptomics with an adaptive graph  
158 attention auto-encoder. *Nature Communications*, 13(1):1739, 2022.
- 159 [7] Chihao Zhang, Kangning Dong, et al. STAMarker: determining spa-  
160 tial domain-specific variable genes with saliency maps in deep learning.  
161 *Nucleic Acids Research*, 51(20):e103–e103, 2023.
- 162 [8] Lawrence Hubert and Phipps Arabie. Comparing partitions. *Journal of*  
163 *Classification*, 2:193–218, 1985.
- 164 [9] Zhiyuan Yuan, Fangyuan Zhao, Senlin Lin, Yu Zhao, Jianhua Yao, Yan  
165 Cui, Xiao-Yong Zhang, and Yi Zhao. Benchmarking spatial clustering  
166 methods with spatially resolved transcriptomics data. *Nature methods*,  
167 21(4):712–722, 2024.
- 168 [10] Kristen R Maynard, Leonardo Collado-Torres, et al. Transcriptome-  
169 scale spatial gene expression in the human dorsolateral prefrontal cortex.  
170 *Nature Neuroscience*, 24(3):425–436, 2021.

- [11] Mohammad Nuwaisir Rahman, Abdullah Al Noman, et al. ScribbleDom: 171  
using scribble-annotated histology images to identify domains in spatial 172  
transcriptomics data. *Bioinformatics*, 39(10):btad594, 2023. 173
- [12] Kim Thrane, Hanna Eriksson, et al. Spatially resolved transcriptomics 174  
enables dissection of genetic heterogeneity in stage iii cutaneous malign- 175  
nant melanoma. *Cancer Research*, 78(20):5970–5979, 2018. 176
- [13] Ao Chen, Sha Liao, et al. Spatiotemporal transcriptomic atlas of mouse 177  
organogenesis using dna nanoball-patterned arrays. *Cell*, 185(10):1777– 178  
1792, 2022. 179
